# Supplementary material for: Validation of Risk Equations for Complications of Type 2 Diabetes (RECODe) Using Individual Participant Data From Diverse Longitudinal Cohorts in the U.S.
Source: Oxford University Press journal article supplement (doi:10.2337/dc17-2002), 2017-12-21

SUPPLEMENTARY DATA

**Supplementary Table 1.** RECODE equations for nephropathy and retinopathy outcomes.

|                                | <b>Nephropathy</b>          |                            |                                                    |                                                                                                |                                                                                                                                                           |                                                                                          | <b>Retinopathy</b>                       |                                |                                                  |                            |                                                                |
|--------------------------------|-----------------------------|----------------------------|----------------------------------------------------|------------------------------------------------------------------------------------------------|-----------------------------------------------------------------------------------------------------------------------------------------------------------|------------------------------------------------------------------------------------------|------------------------------------------|--------------------------------|--------------------------------------------------|----------------------------|----------------------------------------------------------------|
|                                | Microalbuminuria (n = 1551) | Macroalbuminuria (n = 627) | Renal failure or end-stage renal disease (n = 292) | Doubling of serum creatinine or >20 mL/min per 1.73 m <sup>2</sup> decrease in eGFR (n = 5910) | Macroalbuminuria, renal failure, end-stage renal disease, doubling of serum creatinine, or >20 mL/min per 1.73 m <sup>2</sup> decrease in eGFR (n = 6195) | Microalbuminuria, macroalbuminuria, renal failure, or end-stage renal disease (n = 2321) | Photocoagulation or vitrectomy (n = 901) | Cataract extraction (n = 1476) | Three-line reduction in visual acuity (n = 3559) | Severe vision loss (n=776) | Photocoagulation or vitrectomy, or severe vision loss (n=1468) |
| <b>Demographics</b>            |                             |                            |                                                    |                                                                                                |                                                                                                                                                           |                                                                                          |                                          |                                |                                                  |                            |                                                                |
| Age, years                     |                             |                            |                                                    |                                                                                                |                                                                                                                                                           |                                                                                          |                                          |                                |                                                  |                            |                                                                |
|                                | 0.021143                    | 0.007328                   | -0.019380                                          | 0.012220                                                                                       | 0.011629                                                                                                                                                  | 0.019788                                                                                 | -0.003326                                | 0.074570                       | 0.014520                                         | 0.022850                   | 0.00969                                                        |
| Women                          |                             |                            |                                                    |                                                                                                |                                                                                                                                                           |                                                                                          |                                          |                                |                                                  |                            |                                                                |
|                                | 0.169556                    | 0.273800                   | -0.011290                                          | -0.604600                                                                                      | -0.561432                                                                                                                                                 | 0.103898                                                                                 | 0.171867                                 | 0.275100                       | 0.076000                                         | 0.226400                   | 0.22558                                                        |
| <b>Ethnicity</b>               |                             |                            |                                                    |                                                                                                |                                                                                                                                                           |                                                                                          |                                          |                                |                                                  |                            |                                                                |
| Black                          |                             |                            |                                                    |                                                                                                |                                                                                                                                                           |                                                                                          |                                          |                                |                                                  |                            |                                                                |
|                                | -0.008046                   | -0.005558                  | -0.088120                                          | 0.346100                                                                                       | 0.295581                                                                                                                                                  | -0.026498                                                                                | 0.056551                                 | -0.249600                      | -0.106500                                        | -0.167700                  | -0.06502                                                       |
| Hispanic or Latino             |                             |                            |                                                    |                                                                                                |                                                                                                                                                           |                                                                                          |                                          |                                |                                                  |                            |                                                                |
|                                | 0.173419                    | 0.356300                   | 0.233800                                           | -0.136000                                                                                      | -0.091476                                                                                                                                                 | 0.240117                                                                                 | ..                                       | ..                             | ..                                               | ..                         | ..                                                             |
| <b>Clinical features</b>       |                             |                            |                                                    |                                                                                                |                                                                                                                                                           |                                                                                          |                                          |                                |                                                  |                            |                                                                |
| Tobacco smoking, current       |                             |                            |                                                    |                                                                                                |                                                                                                                                                           |                                                                                          |                                          |                                |                                                  |                            |                                                                |
|                                | 0.283616                    | 0.100100                   | 0.148300                                           | -0.086750                                                                                      | -0.066906                                                                                                                                                 | 0.265233                                                                                 | ..                                       | ..                             | ..                                               | ..                         | ..                                                             |
| Systolic blood pressure, mm Hg |                             |                            |                                                    |                                                                                                |                                                                                                                                                           |                                                                                          |                                          |                                |                                                  |                            |                                                                |
|                                | 0.003336                    | -0.001006                  | 0.003027                                           | 0.008283                                                                                       | 0.008876                                                                                                                                                  | 0.001202                                                                                 | 0.012279                                 | 0.001460                       | 0.001382                                         | 0.008243                   | 0.01090                                                        |
| Cardiovascular disease history |                             |                            |                                                    |                                                                                                |                                                                                                                                                           |                                                                                          |                                          |                                |                                                  |                            |                                                                |
|                                | 0.223121                    | 0.255700                   | -0.021640                                          | 0.195600                                                                                       | 0.190118                                                                                                                                                  | 0.180532                                                                                 | 0.283503                                 | 0.180200                       | -0.040920                                        | 0.112700                   | 0.21863                                                        |
| <b>Drug use</b>                |                             |                            |                                                    |                                                                                                |                                                                                                                                                           |                                                                                          |                                          |                                |                                                  |                            |                                                                |

# SUPPLEMENTARY DATA

|                                      |           |           |                |                |           |           |           |                |                |                |          |
|--------------------------------------|-----------|-----------|----------------|----------------|-----------|-----------|-----------|----------------|----------------|----------------|----------|
|                                      |           |           |                |                |           |           |           |                |                |                |          |
| Blood pressure- lowering drugs       |           |           |                |                |           |           |           |                |                |                |          |
|                                      | 0.283715  | 0.241800  | - 0.07952<br>0 | 0.14860<br>0   | 0.185833  | 0.294526  | 0.206905  | 0.10420<br>0   | - 0.01882<br>0 | 0.06393<br>0   | 0.18019  |
| Oral diabetes drugs                  |           |           |                |                |           |           |           |                |                |                |          |
|                                      | 0.065839  | 0.090150  | - 0.12560<br>0 | 0.11610<br>0   | 0.081336  | 0.047868  | -0.407463 | - 0.16670<br>0 | - 0.06002<br>0 | - 0.23490<br>0 | -0.31715 |
| Anticoagulants                       |           |           |                |                |           |           |           |                |                |                |          |
|                                      | 0.421991  | 0.010910  | 0.03199<br>0   | 0.04788<br>0   | 0.014983  | 0.422579  | ..        | ..             | ..             | ..             | ..       |
| <b>Biomarkers</b>                    |           |           |                |                |           |           |           |                |                |                |          |
|                                      |           |           |                |                |           |           |           |                |                |                |          |
| HbA1c, %                             |           |           |                |                |           |           |           |                |                |                |          |
|                                      | 0.138465  | 0.096390  | 0.13690<br>0   | 0.10290<br>0   | 0.103644  | 0.133572  | 0.223394  | 0.09659<br>0   | 0.09346<br>0   | 0.14490<br>0   | 0.17249  |
| Total cholesterol, mg/dL             |           |           |                |                |           |           |           |                |                |                |          |
|                                      | 0.000337  | 0.000094  | - 0.00111<br>2 | 0.00010<br>6   | 0.000642  | 0.000381  | -0.001407 | - 0.00103<br>6 | - 0.00047<br>3 | - 0.00016<br>8 | -0.00106 |
| HDL cholesterol, mg/dL               |           |           |                |                |           |           |           |                |                |                |          |
|                                      | -0.009697 | -0.011350 | 0.00628<br>9   | - 0.00589<br>6 | -0.005206 | -0.006485 | 0.011805  | 0.00731<br>5   | 0.00152<br>1   | 0.00544<br>7   | 0.00845  |
| Serum creatinine, mg/dL              |           |           |                |                |           |           |           |                |                |                |          |
|                                      | 0.670258  | 1.149000  | 0.86090<br>0   | - 3.41100<br>0 | -2.898928 | 0.460670  | 0.815822  | 0.28350<br>0   | 0.06586<br>0   | 0.69470<br>0   | 0.84481  |
| Urine albumin:creatinine ratio, mg/g |           |           |                |                |           |           |           |                |                |                |          |
|                                      | ..        | 0.013350  | 0.00036<br>2   | 0.00020<br>8   | ..        | ..        | ..        | 0.00015<br>9   | 0.00015<br>7   | 0.00019<br>9   | ..       |
|                                      |           |           |                |                |           |           |           |                |                |                |          |

The 10-year risk of an outcome can be computed as  $1 - \lambda^{\exp(\Sigma(\beta \times x) - \text{mean}(\Sigma(\beta \times x)))}$ , where  $\beta$  are the equation coefficients and  $x$  are the values for each covariate for an individual patient within the cohort under study.  $\lambda$  values for the most clinically relevant outcomes of renal failure or end-stage renal disease and severe vision loss are: 0.973 for renal failure or end-stage renal disease, and 0.921 for vision loss, and corresponding values of  $\text{mean}(\Sigma(\beta \times x))$  were 0.23 for renal failure or end-stage renal disease, and 4.56 for vision loss. For example, a 60-year old white man with systolic blood pressure 140 mm Hg, without history of cardiovascular disease, not on any medications, and with HbA1c of 8% (64 mmol/mol), total cholesterol of 190 mg/dL (4.9 mmol/L), HDL of 50mg/dL (1.3 mmol/L), serum creatinine 1.1 mg/dL (97.2 micromol/L) and urine microalb:creatinine ratio of 10 mg/g (1.13 mg/mmol) would have a risk of renal failure/end-stage renal disease of  $1 - 0.973^{\exp(-0.01938 \times 60 + 0.003027 \times 140 + 0.1369 \times 8 - 0.00112 \times 190 + 0.006289 \times 50 + 0.8609 \times 1.1 + 0.000362 \times 10 - 0.23)} = 0.085$  or a 8.5% 10-year risk, where 0.23 is the  $\text{mean}(\Sigma(\beta \times x))$ . People without a known covariate can have the associated term omitted from the equations to enable calculation of risk without the missing data. RECODE=Risk Equations for Complications of type 2 Diabetes.

# SUPPLEMENTARY DATA

**Supplementary Table 2.** RECODE equations for cardiovascular disease outcomes.

| Demographics                         | ASCVD (n=1053) | MI (fatal or nonfatal; n=880) | Stroke (fatal or nonfatal; n=197) | CHF (n=454) | CVD mortality (n=332) | All-cause mortality (n=719) |
|--------------------------------------|----------------|-------------------------------|-----------------------------------|-------------|-----------------------|-----------------------------|
| Age, years                           | 0.034210       | 0.043630                      | 0.028960                          | 0.052680    | 0.055010              | 0.067030                    |
| Women                                | -0.167200      | -0.206600                     | -0.032610                         | 0.252900    | -0.305600             | -0.152900                   |
| Ethnicity                            |                |                               |                                   |             |                       |                             |
| Black                                | -0.118700      | -0.116300                     | 0.271600                          | -0.049690   | 0.079670              | -0.023930                   |
| Clinical features                    |                |                               |                                   |             |                       |                             |
| Tobacco smoking, current             | 0.151000       | 0.235800                      | 0.166500                          | 0.290500    | -0.057640             | 0.539900                    |
| Systolic blood pressure, mm Hg       | 0.000074       | -0.005143                     | 0.016590                          | 0.001217    | -0.003936             | -0.002988                   |
| History of cardiovascular disease    | 0.778400       | 0.961800                      | 0.413800                          | 1.007000    | 1.016000              | 0.588800                    |
| Drug use                             |                |                               |                                   |             |                       |                             |
| Blood pressure-lowering drugs        | 0.055790       | -0.124800                     | 0.159800                          | 0.638900    | -0.157700             | 0.087760                    |
| Statins                              | -0.033610      | 0.046990                      | -0.188700                         | -0.117500   | -0.204500             | -0.268100                   |
| Anticoagulants                       | 0.252400       | 0.544000                      | -0.138700                         | 0.736500    | 0.694600              | 0.403600                    |
| Biomarkers                           |                |                               |                                   |             |                       |                             |
| HbA1c, %                             | 0.171600       | 0.213500                      | 0.336500                          | 0.209200    | 0.245400              | 0.165900                    |
| Total cholesterol, mg/dL             | 0.001929       | 0.000188                      | 0.001710                          | -0.001358   | -0.001266             | -0.000948                   |
| HDL cholesterol, mg/dL               | -0.008370      | -0.013580                     | -0.006392                         | -0.017580   | -0.010810             | -0.004378                   |
| Serum creatinine, mg/dL              | 0.435500       | 0.080270                      | 0.595500                          | 0.821400    | 0.455400              | 0.359700                    |
| Urine albumin:creatinine ratio, mg/g | 0.000333       | 0.000421                      | 0.000302                          | 0.000414    | 0.000469              | 0.000389                    |

The 10-year risk of each outcome can be computed as  $1 - \lambda \exp(\Sigma(\beta \times x) - \text{mean}(\Sigma(\beta \times x)))$ , where beta are the equation coefficients and x are the values for each covariate for an individual patient within the cohort under study. Lambda values were 0.85 for ASCVD, 0.93 for fatal or nonfatal MI, 0.98 for fatal or nonfatal stroke, 0.96 for CHF, 0.97 for cardiovascular mortality, and 0.93 for all-cause mortality, and  $\text{mean}(\Sigma(\beta \times x))$  values were 3.65 for ASCVD, 2.92 for fatal or nonfatal MI, 6.96 for fatal or nonfatal stroke, 5.15 for CHF, 3.97 for CVD mortality, and 4.66 for all-cause mortality in the validation study. For example, a 60-year old white man with systolic blood pressure 140 mm Hg, without history of CVD, not on any medications, and with HbA1c of 8%, total cholesterol of 190 mg/dL (4.9 mmol/L), HDL of 50mg/dL (1.3 mmol/L), serum creatinine 1.1 mg/dL (97.2 micromol/L), and urine microalbumin:creatinine ratio of 10 mg/g (1.13 mg/mmol), would have an all-cause mortality risk of  $1 - 0.93 \exp(6.703e-02 \times 60 - 2.988e-03 \times 140 + 1.659e-01 \times 8 - 9.478e-04 \times 190 - 4.378e-03 \times 50 + 3.597e-01 \times 1.1 + 3.889e-04 \times 10 - 4.66) = 0.09$ , or 9% 10-year risk, where 4.66 is the  $\text{mean}(\Sigma(\beta \times x))$ . People without a known covariate can have the associated term omitted from the equations to enable calculation of risk without the missing data. An online risk calculator is available in both SI and US or conventional units.<sup>25</sup> RECODE=Risk Equations for Complications of type 2 Diabetes. ASCVD=atherosclerotic cardiovascular disease (nonfatal or fatal myocardial infarction or stroke). MI=myocardial infarction. CHF=congestive heart failure. CVD=cardiovascular disease.

## SUPPLEMENTARY DATA

**Supplementary Table 3.** Baseline characteristics of the ACCORD trial participants included for derivation of RECODE equations ( $N = 9,635$ , 2001-2009), and of the DPPOS study ( $N = 1,018$ , 1996-2001) and Look AHEAD study ( $N = 4,760$ , 2001-2012) participants included for previous validation of RECODE equations.<sup>11</sup>

|                                                                        | Included sample, No. (%)      |                                |                               |
|------------------------------------------------------------------------|-------------------------------|--------------------------------|-------------------------------|
|                                                                        | ACCORD<br>( $N = 9,635$ )     | DPPOS<br>( $N = 1,018$ )       | Look AHEAD<br>( $N = 4,760$ ) |
| <b>Demographics</b>                                                    |                               |                                |                               |
| Age, mean (SD), y                                                      | 62.8 (6.7)                    | 50.9 (8.0)                     | 58.9 (6.7)                    |
| Women                                                                  | 3,662 (38.0)                  | 680 (66.8)                     | 2,784 (58.5)                  |
| <b>Race/ethnicity</b>                                                  |                               |                                |                               |
| Black race                                                             | 1,834 (19.0)                  | 244 (24.0)                     | 776 (16.3)                    |
| Hispanic or Latino ethnic group                                        | 678 (7.0)                     | 175 (17.2)                     | 670 (14.1)                    |
| <b>Clinical features</b>                                               |                               |                                |                               |
| Tobacco smoking, current                                               | 1,179 (12.2)                  | 52 (5.1)                       | 202 (4.2)                     |
| Systolic blood pressure, mean (SD), mmHg                               | 136.5 (17.1)                  | 123.7<br>(14.0)                | 129.0 (17.1)                  |
| Cardiovascular disease history                                         | 3,437 (35.7)                  | 12 (1.2)                       | 665 (14.0)                    |
| <b>Medication utilization</b>                                          |                               |                                |                               |
| Blood pressure treatment                                               | 8,109 (84.2)                  | 770 (75.6)                     | 3,410 (71.6)                  |
| Oral diabetes medication (including metformin)                         | 8,024 (83.3)                  | 336 (33.0)                     | 3,246 (68.2)                  |
| Statin use                                                             | 6,148 (63.8)                  | 721 (70.8)                     | 2,142 (45.0)                  |
| Anticoagulant use                                                      | 303 (3.1)                     | N/A                            | N/A                           |
| <b>Biomarkers</b>                                                      |                               |                                |                               |
| Haemoglobin A1c, mean (SD), %                                          | 8.3 (1.1)                     | 6.1 (0.7)                      | 7.3 (1.2)                     |
| Total cholesterol, mean (SD), mmol/L [mg/dL]                           | 4.7 (1.1)<br>[183.2 (41.7)]   | 5.1 (1.1)<br>[196.0<br>(43.7)] | 5.0 (1.0)<br>[191.4 (37.3)]   |
| Direct high-density lipoprotein cholesterol, mean (SD), mmol/L [mg/dL] | 1.1 (0.3)<br>[41.8 (11.6)]    | 1.2 (0.3)<br>[46.0<br>(12.3)]  | 1.1 (0.3)<br>[43.5 (11.9)]    |
| Serum creatinine, mean (SD), $\mu$ mol/L [mg/dL]                       | 78.6 (17.7)<br>[0.9 (0.2)]    | 70.7<br>(17.7)<br>[0.8 (0.2)]  | 70.7 (17.7)<br>[0.8 (0.2)]    |
| Urine albumin/creatinine ratio, mean (SD), mg/mmol [mg/g]              | 11.3 (40.8)<br>[99.2 (359.4)] | N/A                            | 4.9 (22.9)<br>[43.1 (201.5)]  |

N/A = not available in the dataset

## SUPPLEMENTARY DATA

**Supplementary Table 4.** Reclassification table. The table compares risk predictions from RECODE equations to predictions of older risk equations from the UK Prospective Diabetes Study Outcomes Model 2 (UKPDS OM2). The table shows how many people with and without observed events were correctly and incorrectly classified as high or low risk by the older UKPDS OM2 risk equations and by the newer RECODE risk equations in MESA (2000-2012, N = 1,555 persons with type 2 diabetes) and JHS (2000-2012, N = 1,746 persons with type 2 diabetes).

| Outcome                 | MESA<br>% (N reclassified/N per outcome)                                                      |                                                                                               |                                                                                               |                                                                                               | JHS<br>% (N reclassified/N per outcome)                                                       |                                                                                               |                                                                                               |                                                                                               |
|-------------------------|-----------------------------------------------------------------------------------------------|-----------------------------------------------------------------------------------------------|-----------------------------------------------------------------------------------------------|-----------------------------------------------------------------------------------------------|-----------------------------------------------------------------------------------------------|-----------------------------------------------------------------------------------------------|-----------------------------------------------------------------------------------------------|-----------------------------------------------------------------------------------------------|
|                         | Without outcome                                                                               |                                                                                               | With outcome                                                                                  |                                                                                               | Without outcome                                                                               |                                                                                               | With outcome                                                                                  |                                                                                               |
|                         | Incorrectly classified as high-risk by UKPDS and correctly reclassified as low-risk by RECODE | Correctly classified as low-risk by UKPDS but incorrectly reclassified as high-risk by RECODE | Incorrectly classified as low-risk by UKPDS and correctly reclassified as high-risk by RECODE | Correctly classified as high-risk by UKPDS and incorrectly reclassified as low-risk by RECODE | Incorrectly classified as high-risk by UKPDS and correctly reclassified as low-risk by RECODE | Correctly classified as low-risk by UKPDS but incorrectly reclassified as high-risk by RECODE | Incorrectly classified as low-risk by UKPDS and correctly reclassified as high-risk by RECODE | Correctly classified as high-risk by UKPDS and incorrectly reclassified as low-risk by RECODE |
| <b>Reclassification</b> |                                                                                               |                                                                                               |                                                                                               |                                                                                               |                                                                                               |                                                                                               |                                                                                               |                                                                                               |
| <b>Nephropathy</b>      | 240 of 369 (65%)                                                                              | 236 of 643 (37%)                                                                              | 1 of 1 (100%)                                                                                 | 1 of 5 (20%)                                                                                  | 458 of 473 (97%)                                                                              | 0 of 633 (0%)                                                                                 | 1 of 1 (100%)                                                                                 | 1 of 2 (50%)                                                                                  |
| <b>Retinopathy</b>      | 28 of 32 (88%)                                                                                | 5 of 952 (1%)                                                                                 | 1 of 31 (3%)                                                                                  | 1 of 2 (50%)                                                                                  | 17 of 27 (63%)                                                                                | 5 of 96 (5%)                                                                                  | 3 of 17 (18%)                                                                                 | 1 of 12 (8%)                                                                                  |
|                         |                                                                                               |                                                                                               |                                                                                               |                                                                                               |                                                                                               |                                                                                               |                                                                                               |                                                                                               |
|                         | 178 of 829 (21%)                                                                              | 6 of 89 (7%)                                                                                  | 1 of 3 (33%)                                                                                  | 1 of 81 (1%)                                                                                  | 27 of 936 (3%)                                                                                | 0 of 3 (0%)                                                                                   | 0 of 0 (0%)                                                                                   | 1 of 110 (1%)                                                                                 |
| <b>MI</b>               | 261 of 933 (28%)                                                                              | 2 of 32 (6%)                                                                                  | 0 of 0 (0%)                                                                                   | 1 of 37 (3%)                                                                                  | 78 of 978 (8%)                                                                                | 0 of 3 (0%)                                                                                   | 0 of 0 (0%)                                                                                   | 0 of 68 (0%)                                                                                  |
| <b>Stroke</b>           | 169 of 730 (23%)                                                                              | 50 of 230 (22%)                                                                               | 2 of 3 (67%)                                                                                  | 6 of 39 (15%)                                                                                 | 151 of 979 (15%)                                                                              | 16 of 19 (84%)                                                                                | 3 of 3 (100%)                                                                                 | 1 of 48 (2%)                                                                                  |
| <b>CHF</b>              | 195 of 520 (38%)                                                                              | 121 of 438 (28%)                                                                              | 6 of 11 (55%)                                                                                 | 3 of 33 (9%)                                                                                  | 77 of 740 (10%)                                                                               | 59 of 77 (77%)                                                                                | 26 of 32 (81%)                                                                                | 6 of 200 (3%)                                                                                 |
| <b>vs ACC/AHA PCEs</b>  |                                                                                               |                                                                                               |                                                                                               |                                                                                               |                                                                                               |                                                                                               |                                                                                               |                                                                                               |
| <b>ASCVD</b>            | 110 of 563 (20%)                                                                              | 77 of 355 (22%)                                                                               | 9 of 13 (69%)                                                                                 | 6 of 71 (8%)                                                                                  | 69 of 831 (8%)                                                                                | 48 of 108 (44%)                                                                               | 1 of 1 (100%)                                                                                 | 1 of 109 (1%)                                                                                 |

Supplementary Table 5. TRIPOD Checklist: Prediction Model Validation

| Section/Topic                | Item | Checklist Item                                                                                                                                                                                        | Page        |
|------------------------------|------|-------------------------------------------------------------------------------------------------------------------------------------------------------------------------------------------------------|-------------|
| <b>Title and abstract</b>    |      |                                                                                                                                                                                                       |             |
| Title                        | 1    | Identify the study as developing and/or validating a multivariable prediction model, the target population, and the outcome to be predicted.                                                          | 1           |
| Abstract                     | 2    | Provide a summary of objectives, study design, setting, participants, sample size, predictors, outcome, statistical analysis, results, and conclusions.                                               | 2-3         |
| <b>Introduction</b>          |      |                                                                                                                                                                                                       |             |
| Background and objectives    | 3a   | Explain the medical context (including whether diagnostic or prognostic) and rationale for developing or validating the multivariable prediction model, including references to existing models.      | 3-4         |
|                              | 3b   | Specify the objectives, including whether the study describes the development or validation of the model or both.                                                                                     | 4           |
| <b>Methods</b>               |      |                                                                                                                                                                                                       |             |
| Source of data               | 4a   | Describe the study design or source of data (e.g., randomized trial, cohort, or registry data), separately for the development and validation data sets, if applicable.                               | 5           |
|                              | 4b   | Specify the key study dates, including start of accrual; end of accrual; and, if applicable, end of follow-up.                                                                                        | 5-6         |
| Participants                 | 5a   | Specify key elements of the study setting (e.g., primary care, secondary care, general population) including number and location of centres.                                                          | 5-6         |
|                              | 5b   | Describe eligibility criteria for participants.                                                                                                                                                       | 5-6         |
|                              | 5c   | Give details of treatments received, if relevant.                                                                                                                                                     | 5-6         |
| Outcome                      | 6a   | Clearly define the outcome that is predicted by the prediction model, including how and when assessed.                                                                                                | 6-7         |
|                              | 6b   | Report any actions to blind assessment of the outcome to be predicted.                                                                                                                                | N/A         |
| Predictors                   | 7a   | Clearly define all predictors used in developing or validating the multivariable prediction model, including how and when they were measured.                                                         | 7           |
|                              | 7b   | Report any actions to blind assessment of predictors for the outcome and other predictors.                                                                                                            | N/A         |
| Sample size                  | 8    | Explain how the study size was arrived at.                                                                                                                                                            | 7-8         |
| Missing data                 | 9    | Describe how missing data were handled (e.g., complete-case analysis, single imputation, multiple imputation) with details of any imputation method.                                                  | 8           |
| Statistical analysis methods | 10c  | For validation, describe how the predictions were calculated.                                                                                                                                         | 8-9         |
|                              | 10d  | Specify all measures used to assess model performance and, if relevant, to compare multiple models.                                                                                                   | 8-9         |
|                              | 10e  | Describe any model updating (e.g., recalibration) arising from the validation, if done.                                                                                                               | N/A         |
| Risk groups                  | 11   | Provide details on how risk groups were created, if done.                                                                                                                                             | N/A         |
| Development vs. validation   | 12   | For validation, identify any differences from the development data in setting, eligibility criteria, outcome, and predictors.                                                                         | eTable 3    |
| <b>Results</b>               |      |                                                                                                                                                                                                       |             |
| Participants                 | 13a  | Describe the flow of participants through the study, including the number of participants with and without the outcome and, if applicable, a summary of the follow-up time. A diagram may be helpful. | 10, Table 2 |
|                              | 13b  | Describe the characteristics of the participants (basic demographics, clinical features, available predictors), including the number of participants with missing data for predictors and outcome.    | 8, Table 1  |
|                              | 13c  | For validation, show a comparison with the development data of the distribution of important variables (demographics, predictors and outcome).                                                        | eTable 3    |
| Model performance            | 16   | Report performance measures (with CIs) for the prediction model.                                                                                                                                      | 10-12       |
| Model-updating               | 17   | If done, report the results from any model updating (i.e., model specification, model performance).                                                                                                   | N/A         |
| <b>Discussion</b>            |      |                                                                                                                                                                                                       |             |
| Limitations                  | 18   | Discuss any limitations of the study (such as nonrepresentative sample, few events per predictor, missing data).                                                                                      | 15          |
| Interpretation               | 19a  | For validation, discuss the results with reference to performance in the development data, and any other validation data.                                                                             | 14          |
|                              | 19b  | Give an overall interpretation of the results, considering objectives, limitations, results from similar studies, and other relevant evidence.                                                        | 16-17       |
| Implications                 | 20   | Discuss the potential clinical use of the model and implications for future research.                                                                                                                 | 17          |
| <b>Other information</b>     |      |                                                                                                                                                                                                       |             |
| Supplementary                | 21   | Provide information about the availability of supplementary resources, such as study protocol,                                                                                                        | Appendix    |

## SUPPLEMENTARY DATA

|             |    |                                                                               |       |
|-------------|----|-------------------------------------------------------------------------------|-------|
| information |    | Web calculator, and data sets.                                                | ndix  |
| Funding     | 22 | Give the source of funding and the role of the funders for the present study. | 2, 18 |

**Supplementary Figure 1.** Comparison of discrimination and calibration among subjects with diabetes at baseline study enrollment versus diagnosed with diabetes during study period.

(A)

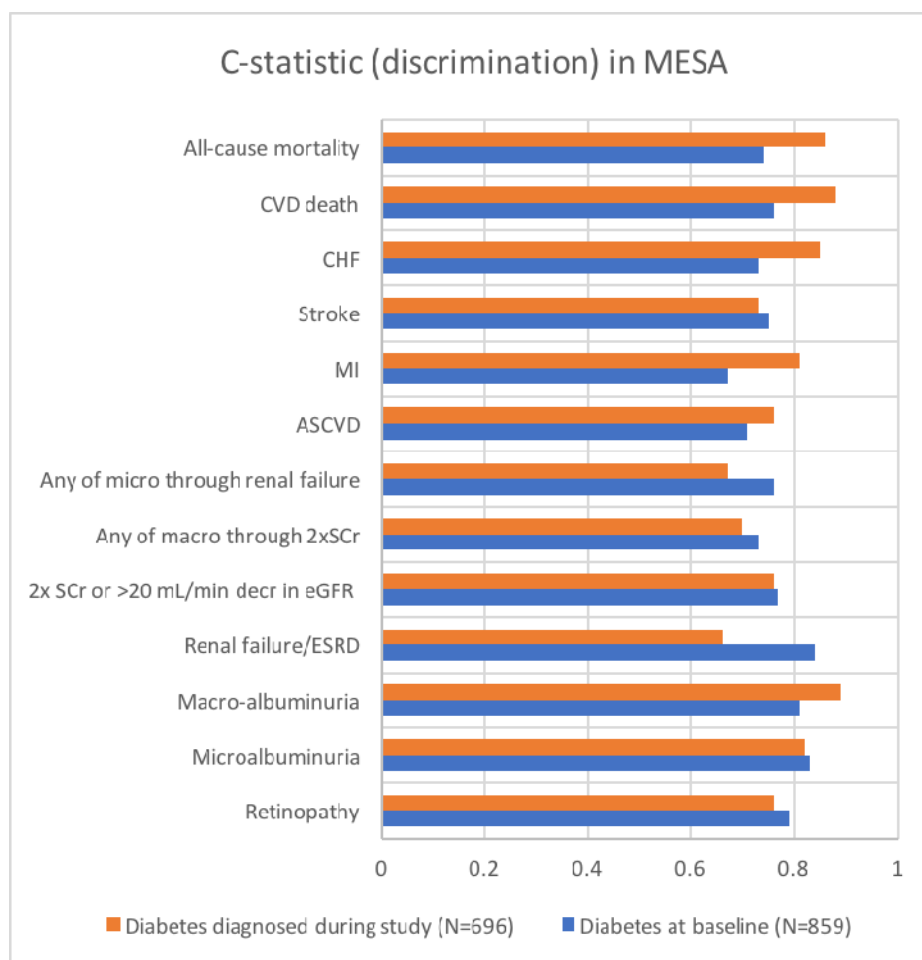

# SUPPLEMENTARY DATA

(B)

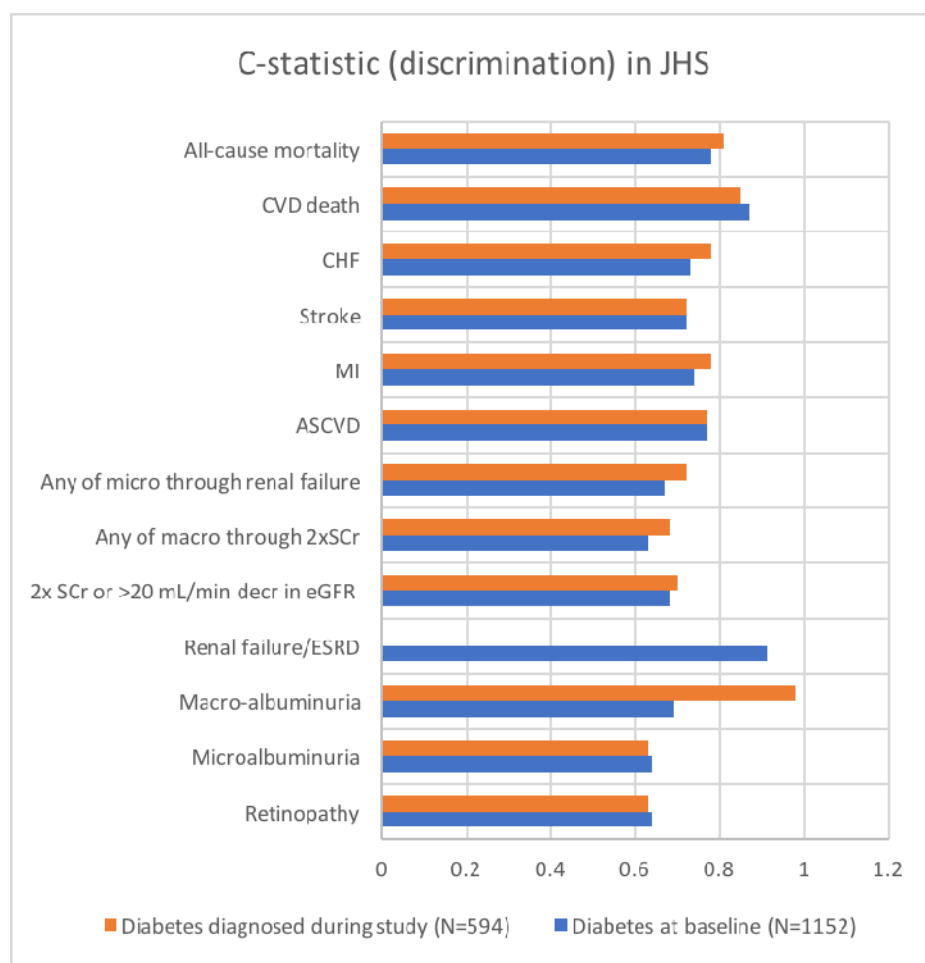



SUPPLEMENTARY DATA  
(C)

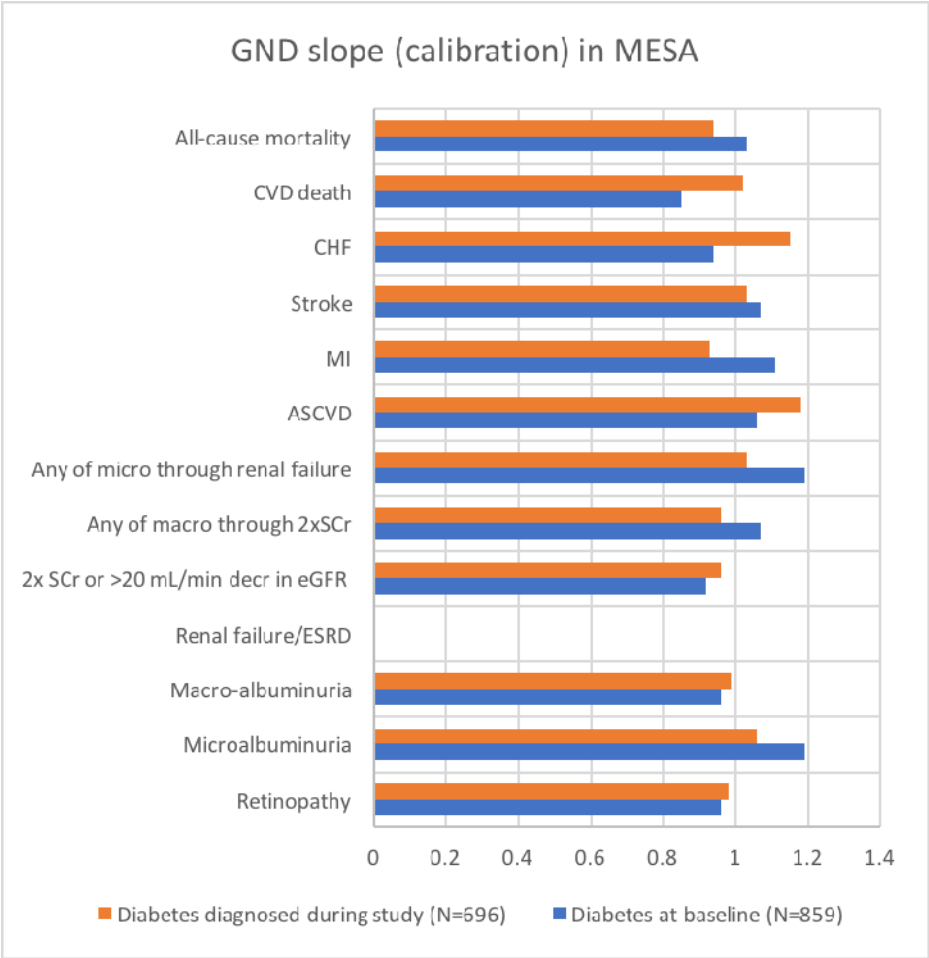

# SUPPLEMENTARY DATA

(D)

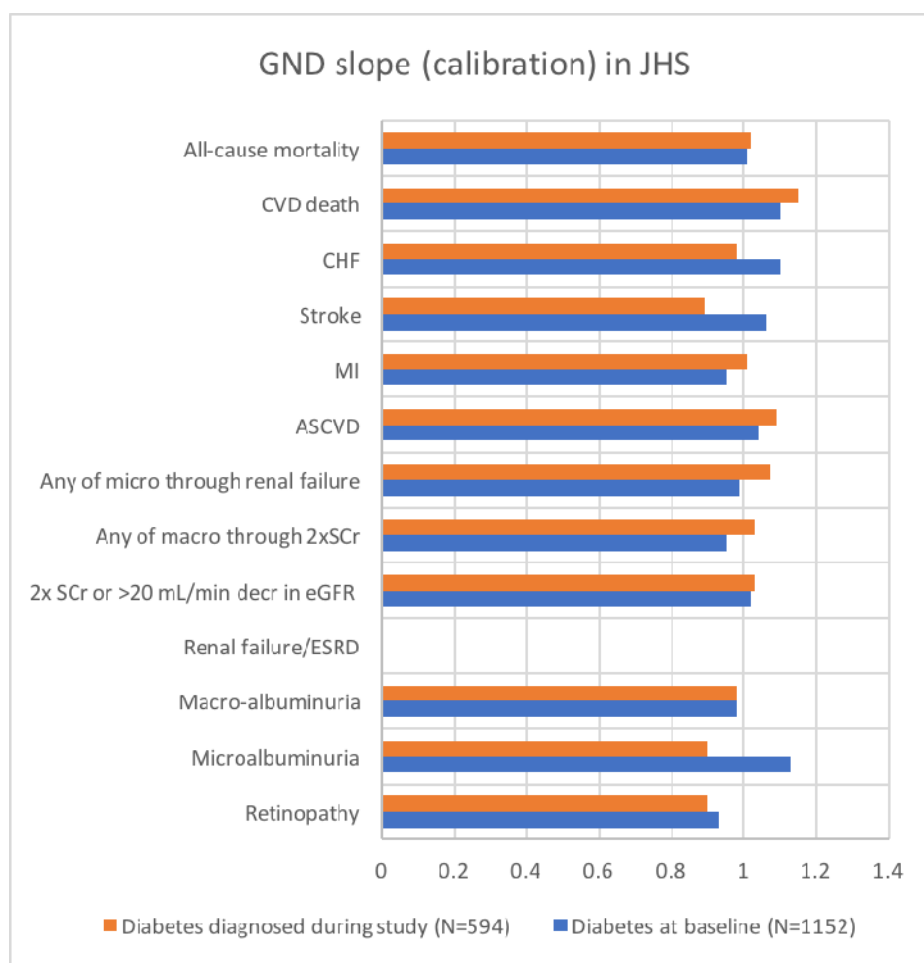

Supplement: dc172002supplementarydata.pdf [file dc172002supplementarydata.pdf]
